# Supplementary material
Source: publisher site journal article supplement (https://www.dovepress.com/article/525408)
Supplement: Supplementary file 1 [file 525408%20Revised%20%09supplementary%20materials.docx]

**Supplementary Table 1 Left ventricular ejection fraction and N-terminal pro B-type natriuretic peptide in patients with progression to stage C heart failure by different glucose metabolic state transitions**

| **Characteristics** | **Stable normoglycemic**  (n=826) | **Stable pre-diabetes**  (n=26) | **Diabetes**  (n=432) | **Normoglycemic progressing to pre-diabetes** (n=122) | **Pre-diabetes**  **back to normoglycemic** (n=57) | **Normoglycemic/**  **pre-diabetes progressing to diabetes**  (n=141) | *P*-value |
| --- | --- | --- | --- | --- | --- | --- | --- |
| **Left ventricular ejection fraction** (%) | 59.96 ± 12.24 | 61.94 ± 10.26 | 60.88 ± 10.82 | 60.93 ± 12.75 | 59.51 ± 12.66 | 59.01 ± 11.38 | 0.71 |
| **N-terminal pro B-type natriuretic peptide** (pg/mL) | 882 (162 - 3,470) | 2,460 (423 - 9,490) | 1,120 (231 - 4,750) | 689 (177 - 2,650) | 234 (102 - 2,360) | 889 (136 - 1,870) | 0.38 |
